# Supplementary material for: Kinetic mechanism of coupled binding in sodium-aspartate symporter GltPh
Source: eLife. 2018 Sep 26;7:e37291. doi: 10.7554/eLife.37291 (PMC6175574; doi:10.7554/eLife.37291)
Supplement: Figure 4—source data 1. — * marks the rate constants that were fixed during KinTek analysis. # marks the rate constants that were optimized in KinTek during global data fitting are in bold. $ A stands for the binding ligand, L-Asp or DL-TBOA. Errors are standard errors of the fit. [file elife-37291-fig4-data1.docx]

|  |  | P11WIFS/L-asp | P11WIFS/DL-TBOA | FM-P11WIFS/L-asp |
| --- | --- | --- | --- | --- |
| T + Na = TNa | *kon*, M-1 s-1  *koff*, s-1  KD, M | 36*  18*  0.5* | 36*  18*  0.5* | 144*  **39 ± 3#**  **0.27** |
| TNa + Na = TNa2 | *kon*, M-1 s-1  *koff*, s-1  KD, M | 107*  8 105*  8 10-2* | 107*  8 105*  8 10-2* | 107*  8 105*  8 10-2* |
| TNa + A = TANa$ | *kon*, M-1 s-1  *koff*, s-1  KD, M | **4.7 104 ± 0.3 104**  **0.47 ± 0.02**  **10-5** | 5 104*  **11.5 ± 5**  **2.3 10-4** | 5 104*  **435 ± 83**  **9 10-3** |
| TNa2 + A = TANa2 | *kon*, M-1 s-1  *koff*, s-1  KD, M | **1.16 106 ± 0.05 106**  **7 10-2 ± 3 10-2**  **6 10-8** | 1.2 106*  **1.72 ± 0.09**  **1.3 10-6** | 1.2 106*  **71 ± 11**  **6 10-5** |
| TANa + Na = TANa2 | *kon*, M-1 s-1  *koff*, s-1  KD, M | 107*  5 103*  5 10-4* | 107*  5 103*  5 10-4* | 107*  5 103*  5 10-4* |
| TANa2 + Na = TANa3 | *kon*, M-1 s-1  *koff*, s-1  KD, M | 107*  100*  10-5* | N/A | 107*  100*  10-5* |
